# Supplementary material
Source: PubMed Central journal article supplement (PMC3464077)
Supplement: Supp_Fig1.pdf [file Supp_Fig1.pdf]

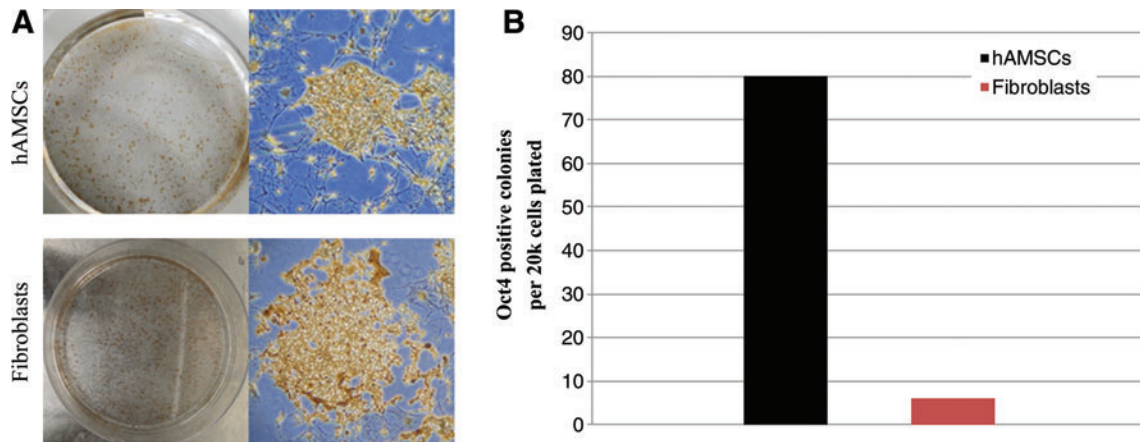

**SUPPLEMENTARY FIG. S1.** High reprogramming efficiency of hAMSCs. **(A)** Oct4 horseradish peroxidase staining conducted on day 18 of hAMSC and day 38 of fibroblast reprogramming. Approximately 50,000 hAMSCs and 500,000 fibroblasts were necessary to generate the respective positive Oct4 colonies. **(B)** The number of Oct4-positive colonies produced per 20,000 hAMSCs and fibroblasts. hAMSCs, human amniotic mesenchymal stem cells.
