# Supplementary material
Source: PubMed Central journal article supplement (PMC3464077)
Supplement: Supp_Fig2.pdf [file Supp_Fig2.pdf]

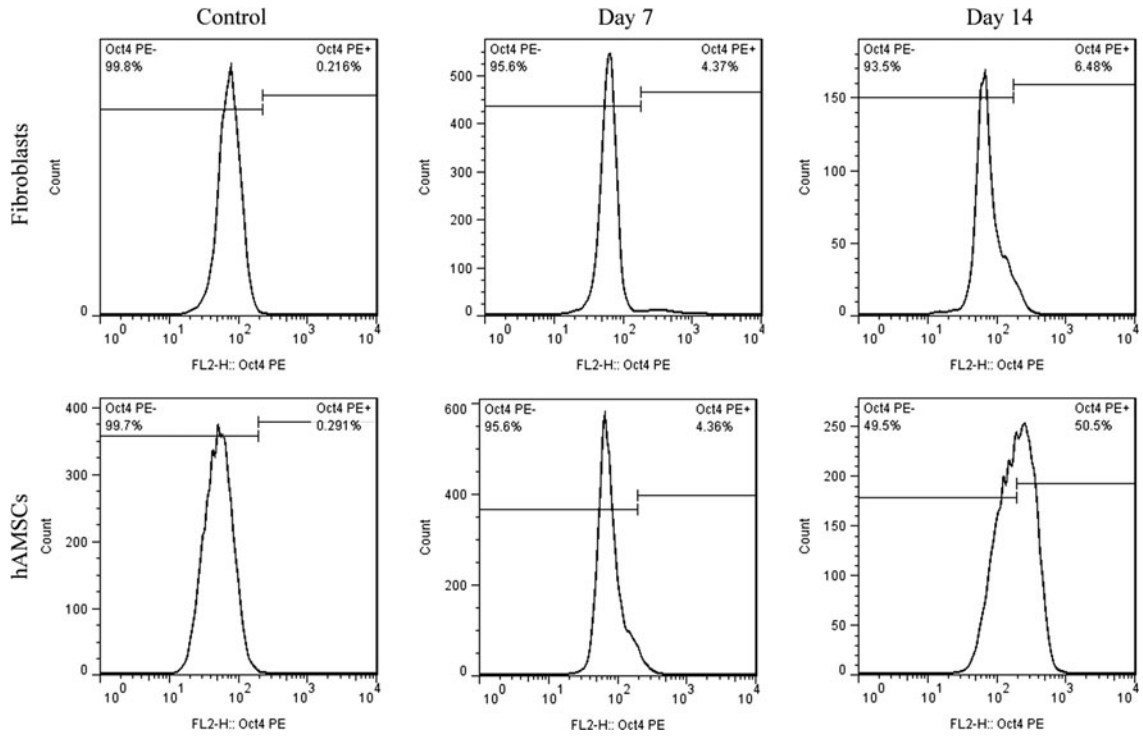

**SUPPLEMENTARY FIG. S2.** Flow cytometry of Oct4-positive cells in reprogrammed hAMSCs and fibroblasts. Flow cytometry was performed on days 7 and 14 during the reprogramming process of hAMSCs and fibroblasts. The results revealed that an ~8-fold increase in Oct4-positive cells was found in the hAMSCs (*lower panel*) compared with the fibroblasts (*top panel*) by day 14.
