# Supplementary material
Source: PubMed Central journal article supplement (PMC3464077)
Supplement: Supp_Fig3.pdf [file Supp_Fig3.pdf]

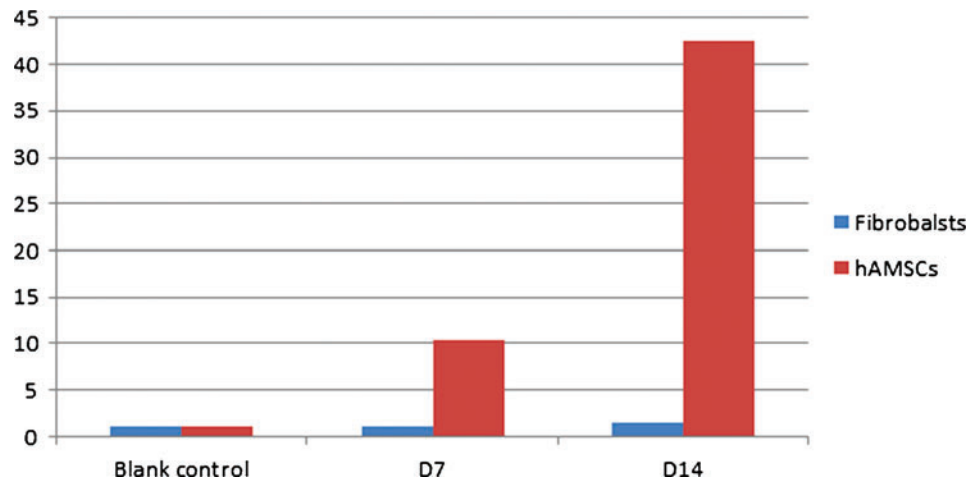

**SUPPLEMENTARY FIG. S3.** Real-time PCR of Oct4 expression in reprogrammed hAMSCs and fibroblasts. Real-time PCR results demonstrated a 20-fold increase in Oct4 expression in the hAMSCs compared with the fibroblasts by day 14.
