# Supplementary material
Source: PubMed Central journal article supplement (PMC3464077)
Supplement: Supp_Fig4.pdf [file Supp_Fig4.pdf]

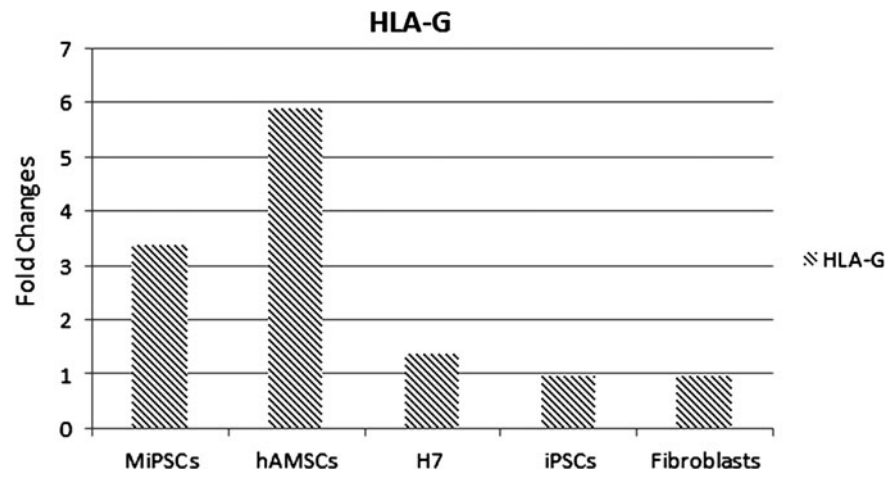

**SUPPLEMENTARY FIG. S4.** HLA-G was expressed in MiPSCs and hAMSCs. Real-time PCR revealed that HLA-G was expressed in the MiPSCs and the hAMSCs, which was not seen in the H7 cells and the iPSCs derived from fibroblasts. Fibroblasts were used as a blank control. MiPSCs, hAMSC-derived iPSCs.
