# Supplementary material
Source: PubMed Central journal article supplement (PMC3464077)
Supplement: Supp_Table1.pdf [file Supp_Table1.pdf]

SUPPLEMENTARY TABLE S1. SEQUENCE OF PRIMERS

| <i>Primer name</i> | <i>Sequence (5'-3')</i>               |
|--------------------|---------------------------------------|
| hHLA-G_F           | GCTCCCACTCCATGAGGTAT                  |
| hHLA-G_R           | GGTGTTCCCGTGTCTCCTCTT                 |
| hHLA-A_F           | GGAGTATTGGGACCAAGGAGA                 |
| hHLA-A_R           | GTTCAGGGCGATGTAATCCT                  |
| hHLA-B_F           | CCGGGTCTCACACCCTCCAG                  |
| hHLA-B_R           | CCTCCAGGTAGGCTCTCCGC                  |
| hHLA-C_F           | CGGGATGGGGAGGACCAGAC                  |
| hHLA-C_R           | AGGGTGAGGGGCTCTTGACAG                 |
| hHLA-DR_F          | TCCTGCCCAGGGAAGACCAC                  |
| hHLA-DR_R          | CAGACCCACAGTCAGGCCCA                  |
| hSOX-2_F           | CATCGACGAGGCTAAGCGGC                  |
| hSOX-2_R           | TGTCCATGCGCTGGTTCACG                  |
| hNANOG_F           | TAACCTTGGCTGCCGTCTCTGG                |
| hNANOG_R           | GCAAAGCCTCCCAATCCCAAACA               |
| hREX-1_F           | CCTGTGGCCACCTCAGGGAA                  |
| hREX-1_R           | CAAAGAGGTCGGCGTGGCTC                  |
| hOCT4_F            | ATCAAGCAGCGACTATGCAC                  |
| hOCT4_R            | GAAAGGGACCGAGGAGTACA                  |
| hTDGF1_F           | CTG CTG CCT GAA TGG GGG AAC CTG C     |
| hTDGF1_R           | GCC ACG AGG TGC TCA TCC ATC ACA AGG   |
| hGABRB3_F          | CCT TGC CCA AAA TCC CCT ATG TCA AAG C |
| hGABRB3_R          | GTA TCG CCA ATG CCG CCT GAG ACC TC    |
| hDNMT3B_F          | TGC TGC TCA CAG GGC CCG ATA CTT C     |
| hDNMT3B_R          | TCC TTT CGA GCT CAG TGC ACC ACA AAA C |
| hTERT_F            | CCT GCT CAA GCT GAC TCG ACA CCG TG    |
| hTERT_R            | GGA AAA GCT GGC CCT GGG GTG GAG C     |
| hNAT1_F            | AGG GTT CGG GGG AGG TAA GGG TGC       |
| hNAT1_R            | AGG GTT GCG TGC GTA AAG CCG GAG       |
| hBRX_F             | CAC CAC GGT ATC ATC CCA AAA GCC AAC C |
| hBRX_R             | ACG CCG ATG CAT GTT TGG TGA CTG GTA G |
| hKLF4_F            | CAC CAT GGC TGT CAG TGA CGC GCT GCT   |
| hKLF4_R            | TTA AAA ATG TCT CTT CAT GTG TAA GGC   |
| hCD9-F             | GTG CAT GCT GGG ACT GTT CTT CGG CTT C |
| hCD9-R             | CAC GCC CCC AGC CAA ACC ACA GCA G     |
| hGDF3_F            | CTT ATG CTA CGT AAA GGA GCT GGG       |
| hGDF3_R            | GTG CCA ACC CAG GTC CCG GAA GTT       |
| hGAL_F             | TGC GGC CCG AAG ATG ACA TGA AAC C     |
| hGAL_R             | CCC AGG AGG CTC TCA GGA CCG CTC       |
| hNODAL_F           | GGG CAA GAG GCA CCG TCG ACA TCA       |
| hNODAL_R           | GGG ACT CGG TGG GGC TGG TAA CGT TTC   |
| hLEFTB_F           | CTT GGG GAC TAT GGA GCT CAG GGC GAC   |
| hLEFTB_R           | CAT GGG CAG CGA GTC AGT CTC CGA GG    |
| hGRB7_F            | CGC CTC TTC AAG TAC GGG GTG CAG CTG T |
| hGRB7_R            | TGG GCA GGC TGA GGC GGT GGT TTG       |
| hFITM1_F           | CCC CAA AGC CAG AAG ATG CAC AAG GAG   |
| hFITM1_R           | CGT CGC CAA CCA TCT TCC TGT CCC TAG   |
| hEBAF_F            | GCT GGA GCT GCA CAC CCT GGA CCT CAG   |
| hEBAF_R            | GGG CAG CGA GGC AGT CTC CGA GGC       |
| hMYC_F             | GCC ACA GCA AAC CTC CTC ACA GCC CAC   |
| hMYC_R             | CTC GTC GTT TCC GCA ACA AGT CCT CTT C |
| hTDGF1_F           | CTG CTG CCT GAA TGG GGG AAC CTG C     |
| hTDGF1_R           | GCC ACG AGG TGC TCA TCC ATC ACA AGG   |
| hFGF4_F            | CTA CAA CGC CTA CGA GTC CTA CA        |
| hFGF4_R            | GTT GCA CCA GAA AAG TCA GAG TTG       |
| hUTF1_F            | CCG TCG CTG AAC ACC GCC CTG CTG       |
| hUTF1_R            | CGC GCT GCC CAG AAT GAA GCC CAC       |
| hPODXL_F           | TCC AGC CCC ACA GCA GCA TCA ACT ACC   |
| hPODXL_R           | CCG GGT TGA AGG TGG CTT TGA CTG CTC   |
